# Supplementary material for: P=O Functionalized Black Phosphorus/1T-WS2 Nanocomposite High Efficiency Hybrid Photocatalyst for Air/Water Pollutant Degradation
Source: MDPI journal article supplement (doi:10.3390/ijms23020733), 2022-01-10
Supplement: s1 [file s1]

Supplementary Information for

# P=O Functional Black Phosphorus / 1T-WS<sub>2</sub> 2D Nanocomposite Enhanced Efficiency Hybrid Visible-Light Photocatalyst for Environmental Pollutant Degradation

Scheme S1

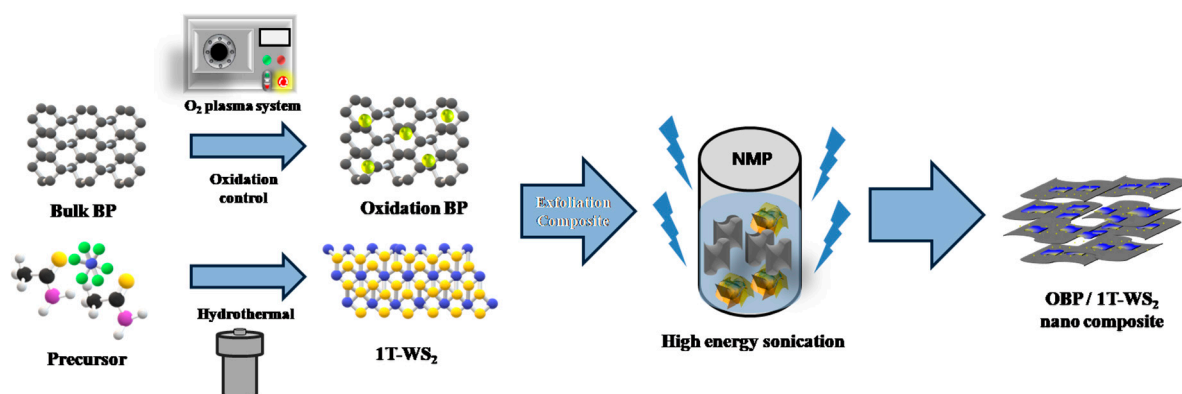

**Scheme S1.** Schematic illustration of the preparation of oxidation controlled black phosphorus /1T-WS<sub>2</sub> nanocomposite.

Scheme S2.

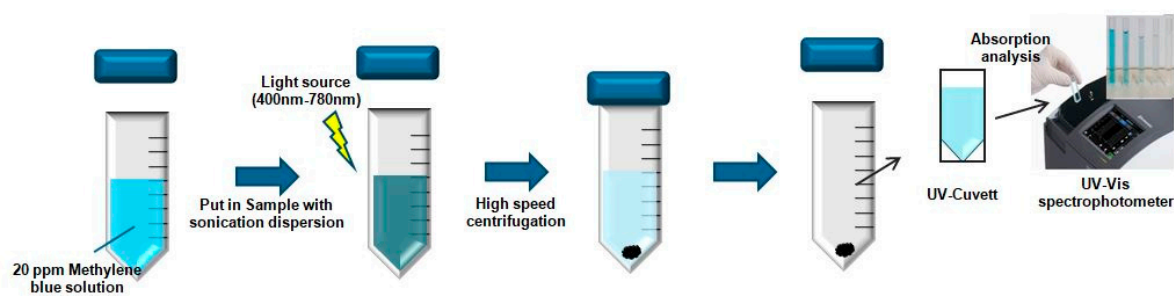

**Scheme S2.** Procedure for experiments regarding methylene blue solution degradation photocatalytic performance.

Scheme S3.

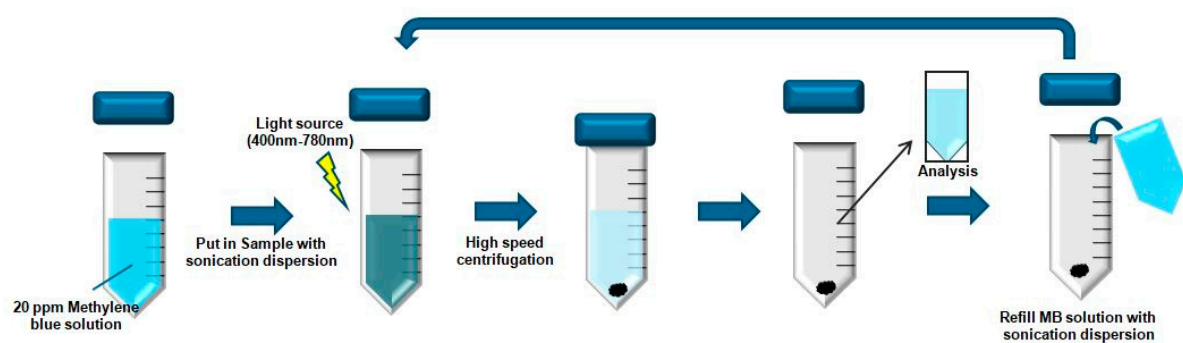

Scheme S3. Procedure for methylene blue degradation recycling test.

Scheme S4.

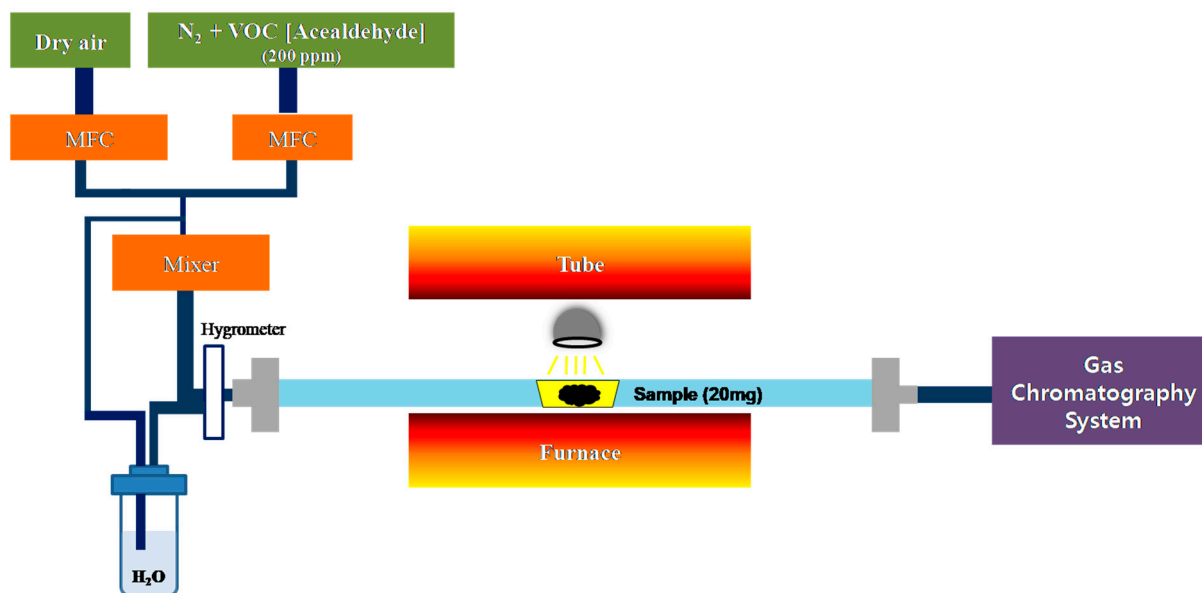

Scheme S4. Experimental set-up for photocatalytic VOC degradation.

Figure S1.

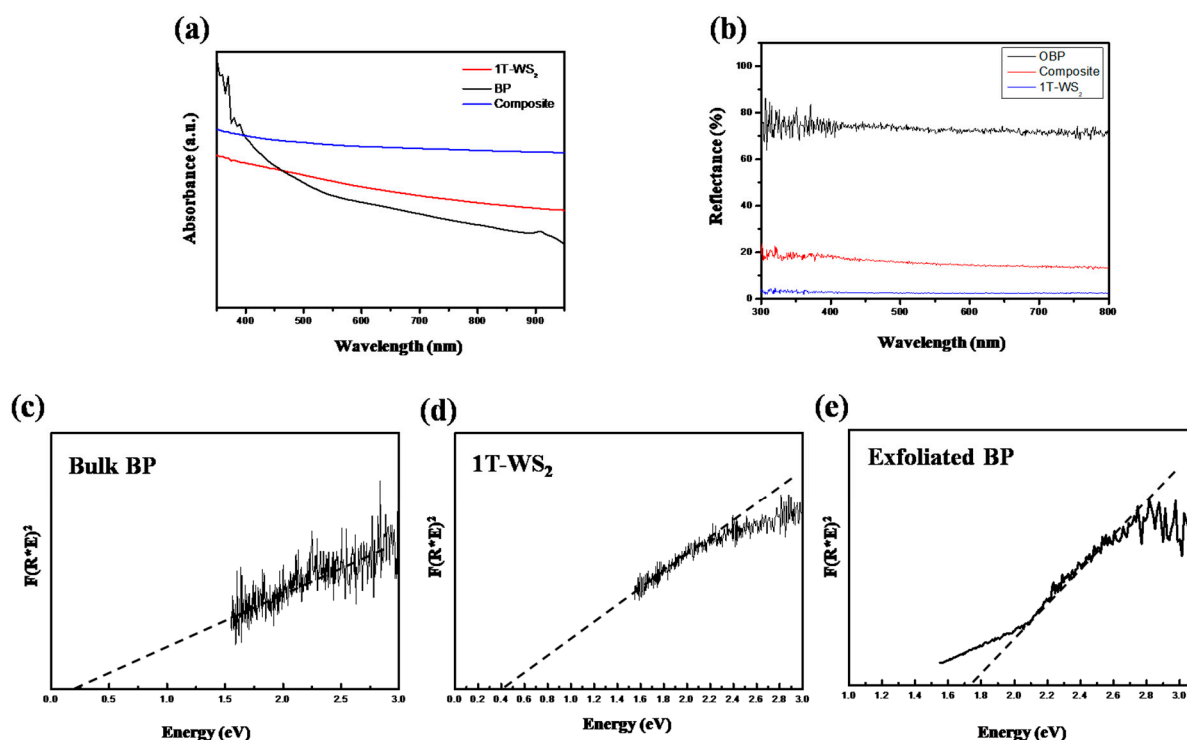

Figure S1. (a) Absorbance spectra of OBP, 1T-WS<sub>2</sub>, and nanocomposite. (b) Diffuse reflectance spectra of OBP, 1T-WS<sub>2</sub>, and nanocomposite. The bandgap of (c) OBP, (d) 1T-WS<sub>2</sub>, and (e) exfoliated BP calculated using Kubelka-Munk's theory.

Figure S2.

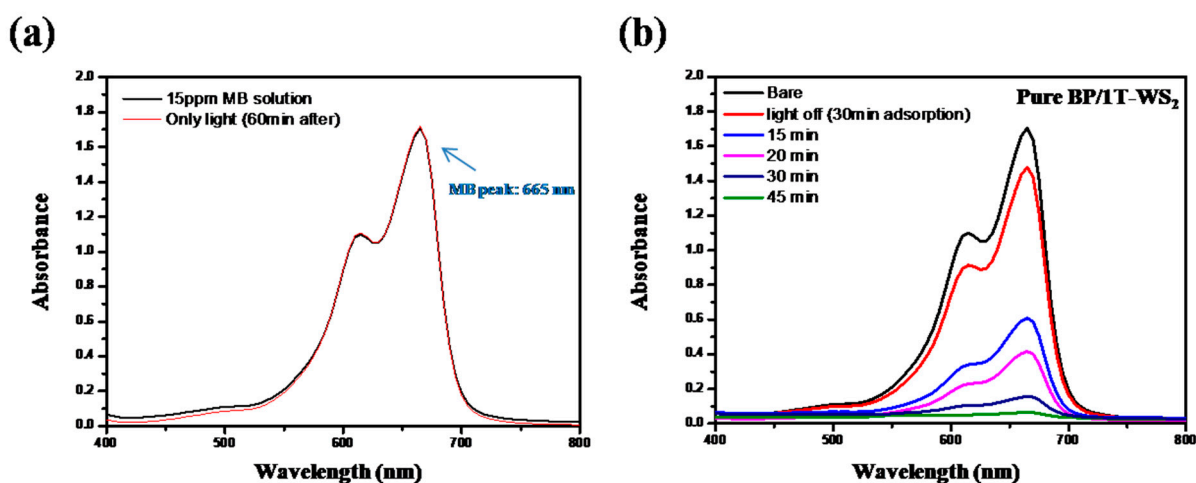

Figure S2. (a) Results of methylene blue solution irradiation for 60 min under light without photocatalytic material. (b) UV-vis spectra of the methylene blue solution (20 ppm), which was degraded by pure BP/1T-WS<sub>2</sub>.

Figure S3

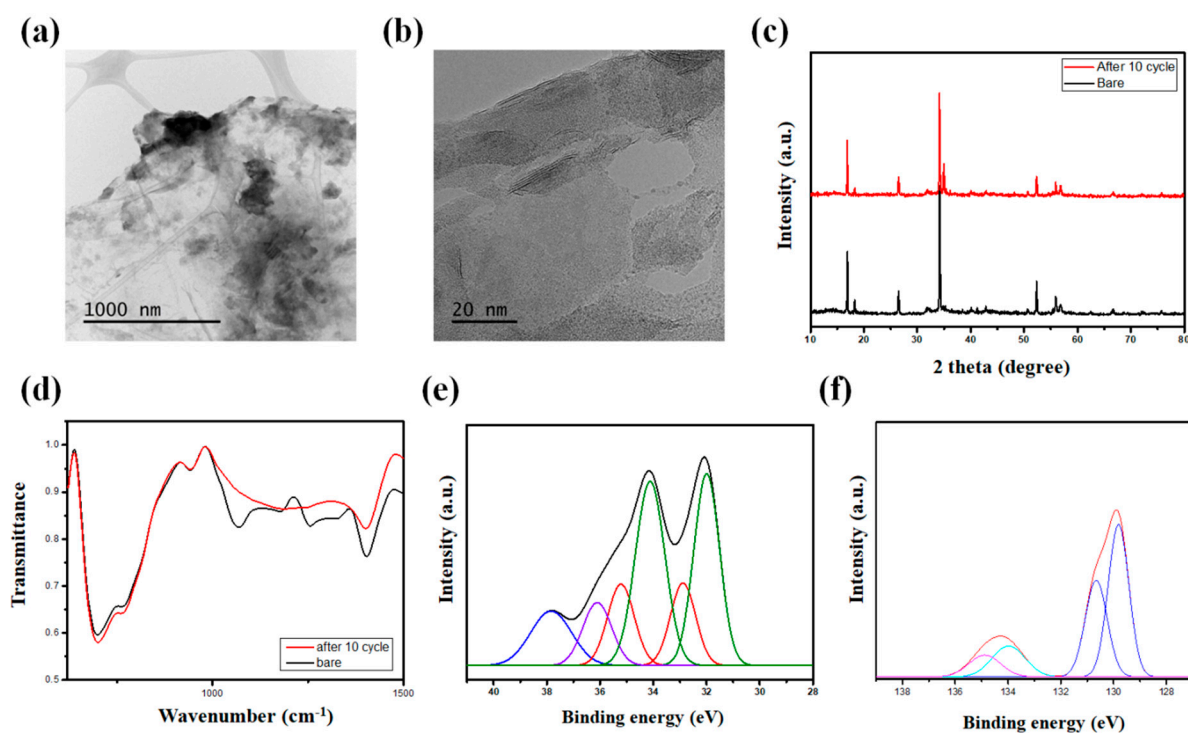

Figure S3. (a, b) TEM, (c) XRD, (d) FT-IR, and (e,f) XPS data of the OBP/1T-WS<sub>2</sub> nanocomposite after continuous photocatalytic reaction stability testing in Figure 6c.

Figure S4.

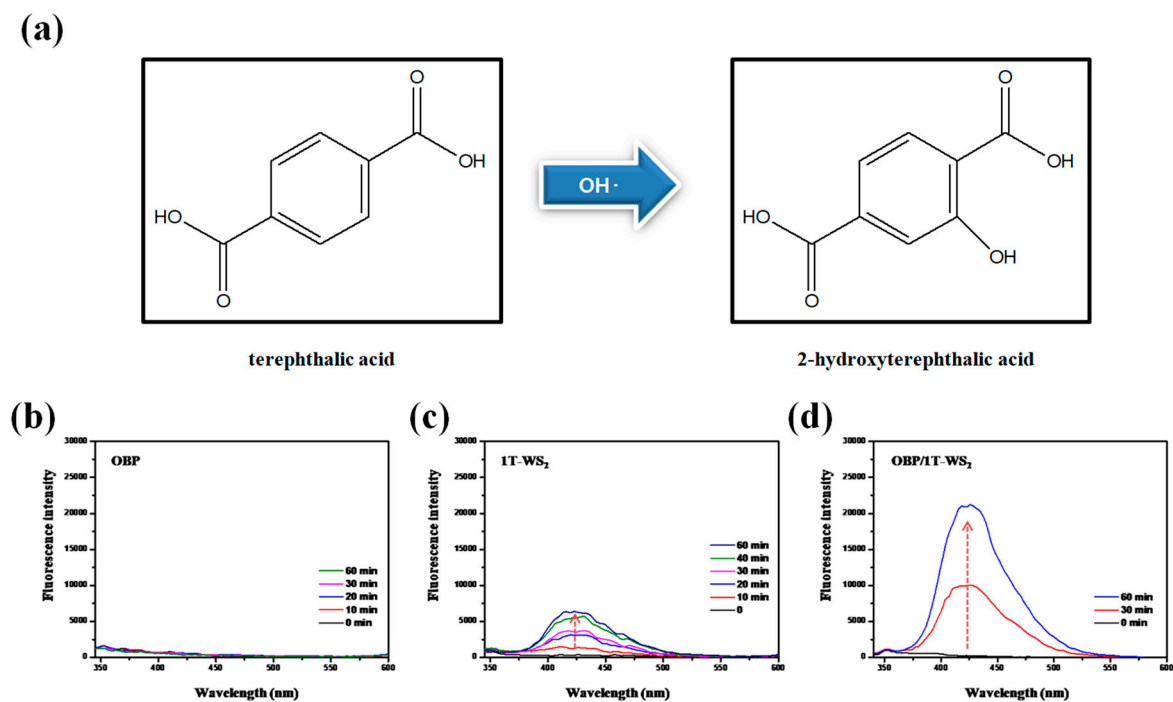

Figure S4. (a) The formation of hydroxy products due to the reaction between terephthalic acid and  $\cdot\text{OH}$ . The production of 2-hydroxyterephthalic acid was monitored by measuring the fluorescence emission spectra ( $\lambda_{\text{em}} = 425 \text{ nm}$ ,  $\lambda_{\text{ex}} = 315 \text{ nm}$ ) obtained over OBP (b), 1T-WS<sub>2</sub> (c), OBP/1T-WS<sub>2</sub> (d).

Table S1.

Table S1. Comparison with reported cases of MB decomposition visible photocatalyst.

| Photocatalyst material                       | Bare MB Absorbance               | Kinetic parameter                                         | Reaction time | Recycle Test    | Reference         |
|----------------------------------------------|----------------------------------|-----------------------------------------------------------|---------------|-----------------|-------------------|
| CeO <sub>2</sub> /TiO <sub>2</sub> nanotube  | 0.8                              | $3.6 \times 10^{-2} \text{ min}^{-1}$                     | 150 min       | 3 cycle         | 79                |
| Palladium doped TiO <sub>2</sub>             | 3.0                              | $4.4 \times 10^{-2} \text{ min}^{-1}$                     | 150 min       | 10 cycle        | 97                |
| TiO <sub>2</sub> / Graphene Porous composite | 10 mgL <sup>-1</sup>             | $2.1 \times 10^{-2} \text{ Min}^{-1}$                     | 180 min       | 3 cycle         | 98                |
| C-doped anatase TiO <sub>2</sub>             | Not shown / 50 ml                | $0.7 \times 10^{-2} \text{ Min}^{-1}$                     | 90~120 min    | N/A             | 99                |
| <b>OBP/1T-WS<sub>2</sub> nanocomposite</b>   | <b>1.6 (20 mgL<sup>-1</sup>)</b> | <b><math>10.31 \times 10^{-2} \text{ min}^{-1}</math></b> | <b>20 min</b> | <b>10 cycle</b> | <b>This study</b> |

Table S2.

Table S2. Comparison with reported cases of acetaldehyde decomposition visible photocatalyst.

| Photocatalyst material                                          | Light Source         | catalytic efficiency                                                                                           | Reference         |
|-----------------------------------------------------------------|----------------------|----------------------------------------------------------------------------------------------------------------|-------------------|
| GO-TiO <sub>2</sub>                                             | 200 W Xenon lamp     | 65% degradation<br>25 ppm / 0.1g                                                                               | 100               |
| S-doped TiO <sub>2</sub>                                        | F8T5 WW 8W lamp      | 60% degradation 500mg<br>500 mL of acet-aldehyde with<br>500 µM initial concentration<br>(in aqueous solution) | 101               |
| Mica/TiO <sub>2</sub> /Fe <sub>2</sub> O <sub>3</sub> composite | 10 mgL <sup>-1</sup> | 80% degradation<br>500 ppm 8 sccm 0.1g                                                                         | 102               |
| <b>OBP/1T-WS<sub>2</sub> nanocomposite</b>                      | <b>20W White LED</b> | <b>60 µmol / g min</b>                                                                                         | <b>This study</b> |
